# Supplementary figures and images for: Prioritization of candidate cancer genes—an aid to oncogenomic studies
Source: PubMed Central journal article supplement — Nucleic Acids Res. 2008 Aug 18;36(18):e115. doi: 10.1093/nar/gkn482 (PMC2566894; doi:10.1093/nar/gkn482), 2008-08-18

# Supplementary Figure 1

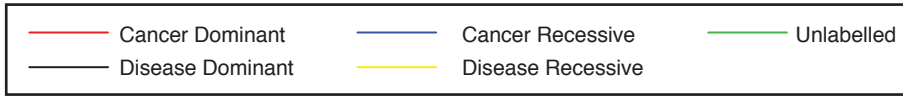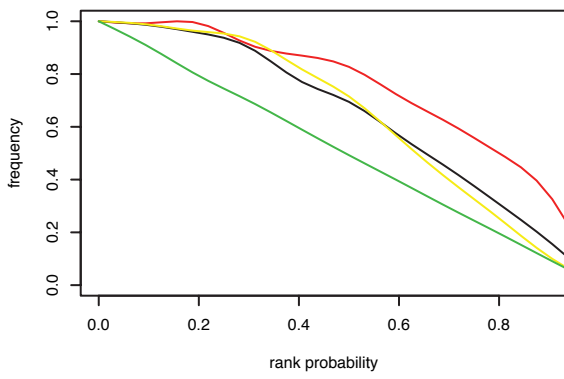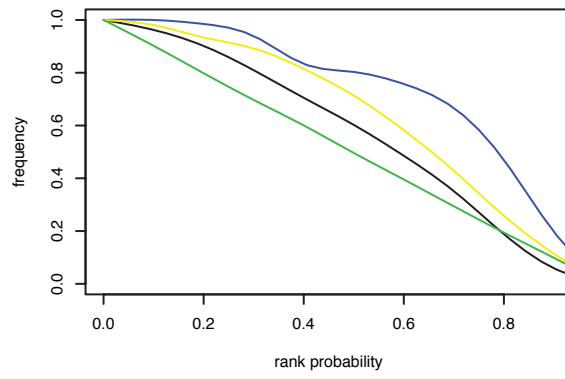

**PC-GS**

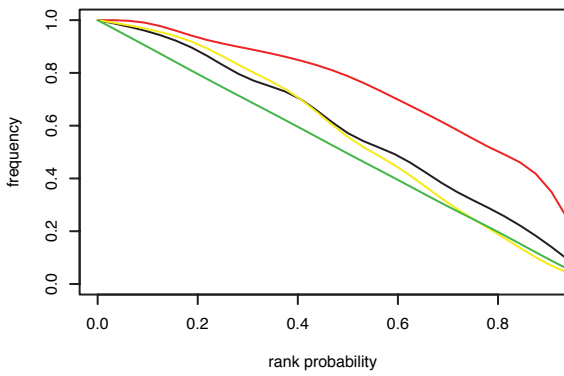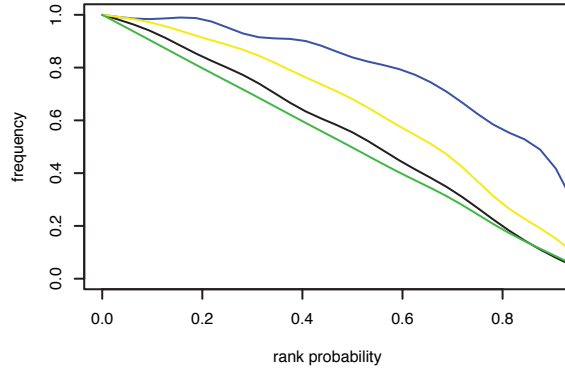

**PC-GS-PD**

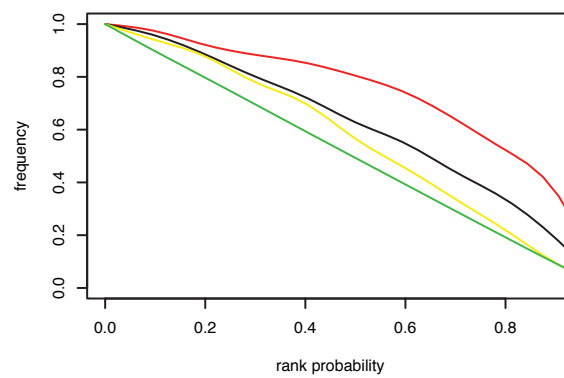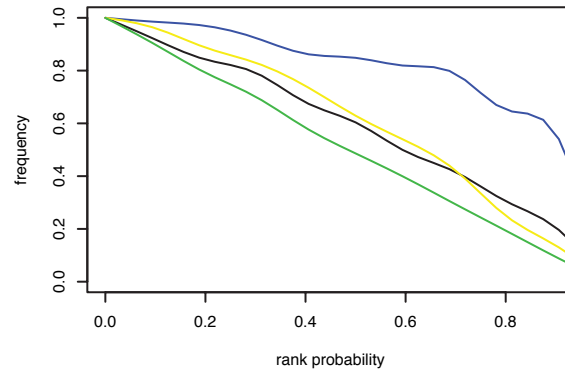

**PC-GS-PI**

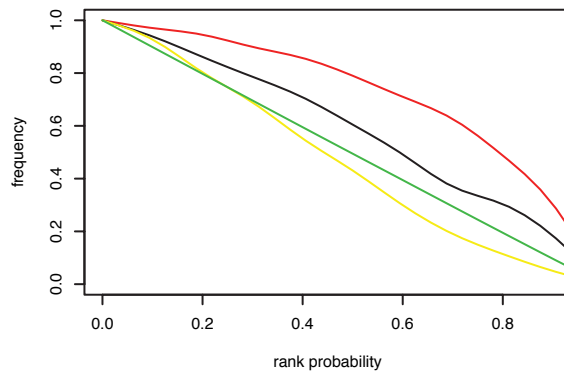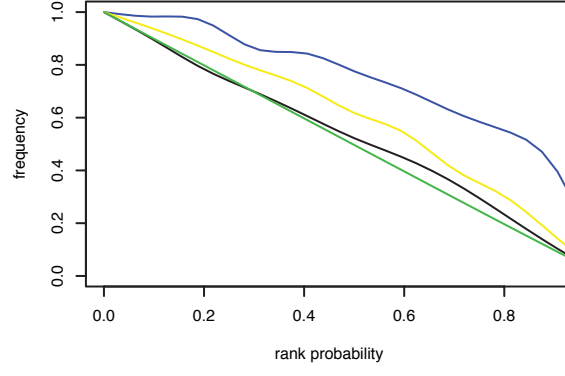

**PC-GS-RD**

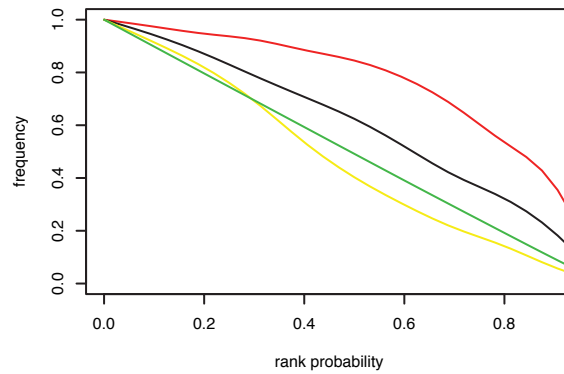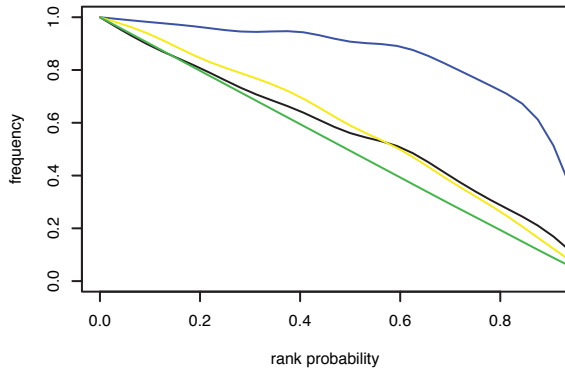

**PC-GS-PD-PI-RD**

**Onc-C**

**TSG-C**

Supplement: gkn482_1.pdf [file gkn482_1.pdf]

# Supplementary Figure 2

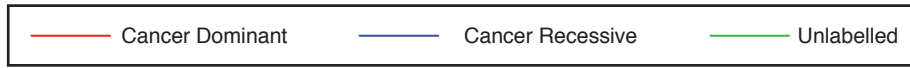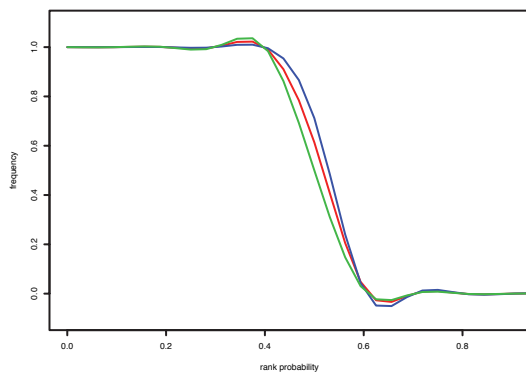

**PC-GS**

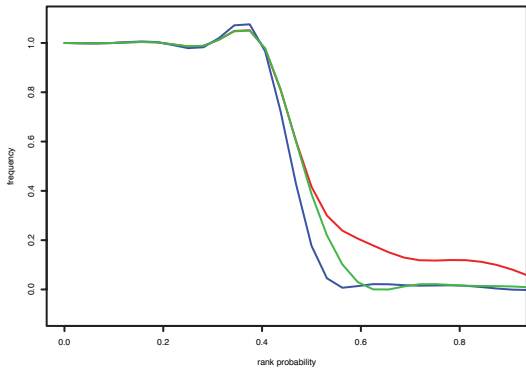

**PC-GS-PD**

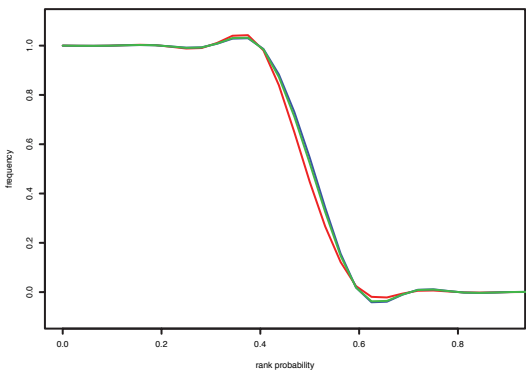

**PC-GS-PI**

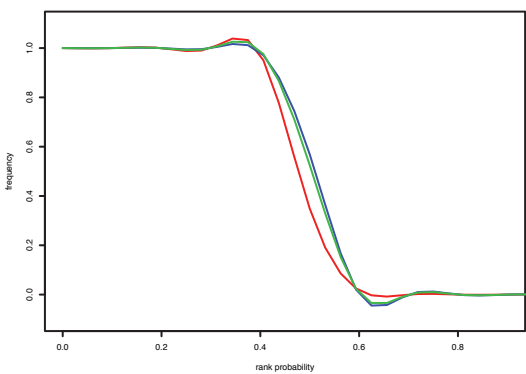

**PC-GS-RD**

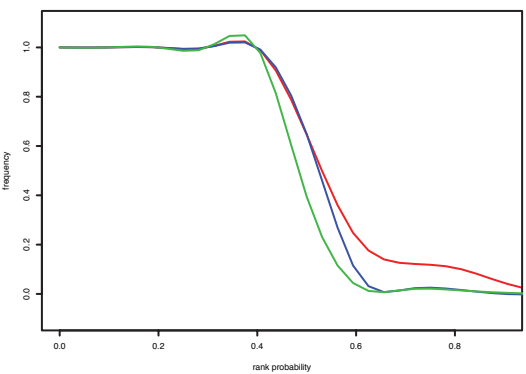

**Onc-C**

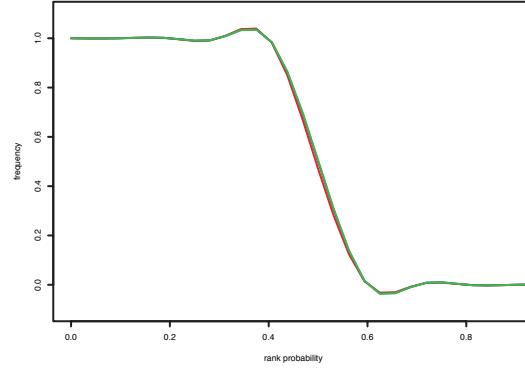

**PC-GS-PD**

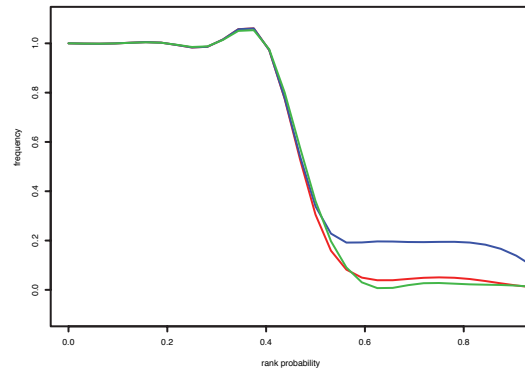

**PC-GS-PI**

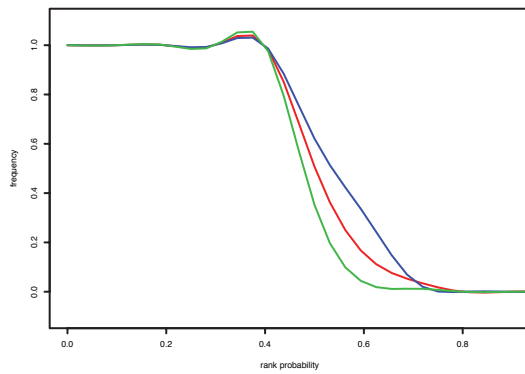

**PC-GS-RD**

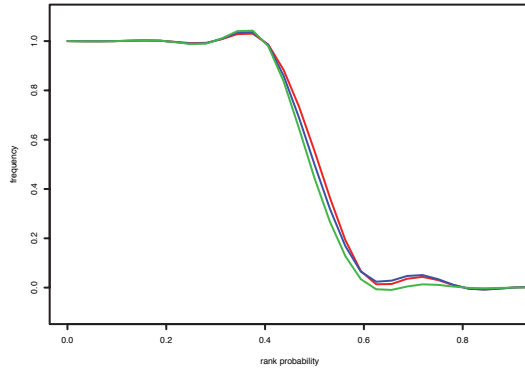

**PC-GS-PD-PI-RD**

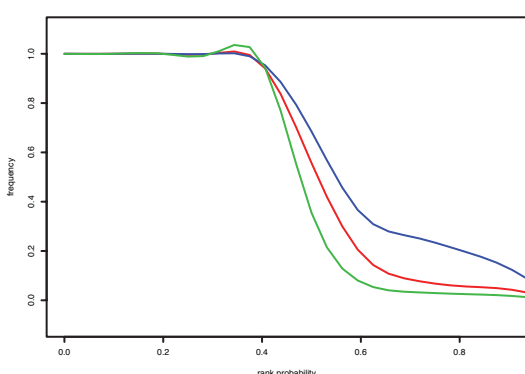

**TSG-C**

Supplement: gkn482_2.pdf [file gkn482_2.pdf]
